# Supplementary figures and images for: Evaluation of surface acetylated and internally quaternized poly(propylene imine) dendrimer as a biocompatible drug carrier for piroxicam as a model drug
Source: Royal Society of Chemistry journal article supplement (doi:10.1039/c5ra20704e), 2015-01-01

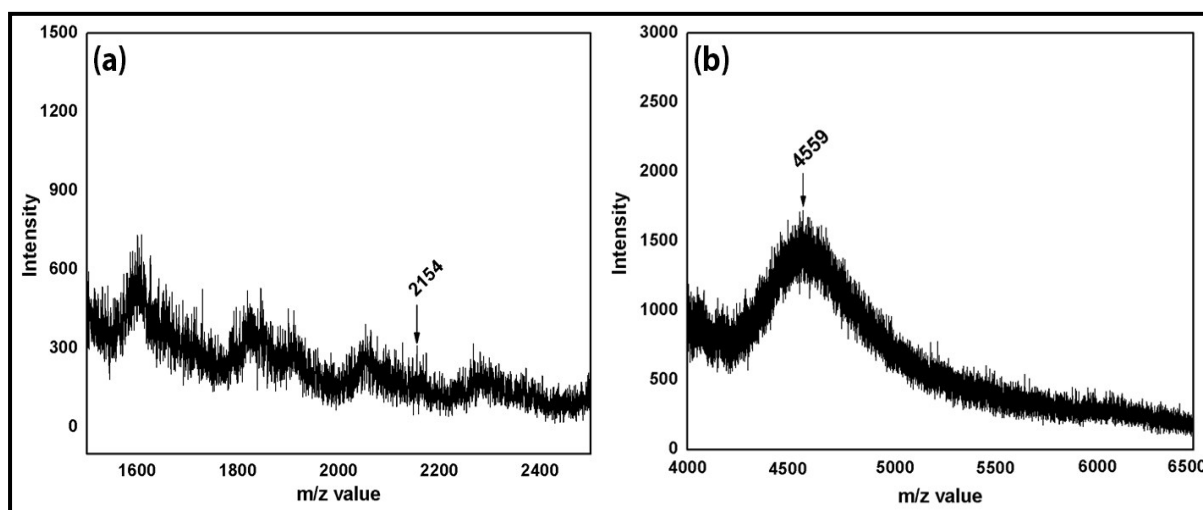

**Fig. S1** MALDI-TOFF Spectrum of (a) QPPI-NHAc (G2) and (b) QPPI-NHAc (G3)

Supplement: c5ra20704e1.pdf [file c5ra20704e1.pdf]
